# Supplementary material
Source: PubMed Central journal article supplement (PMC6132229)
Supplement: NIHMS723816-supplement-125_2015_3747_MOESM2_ESM.pdf [file NIHMS723816-supplement-125_2015_3747_MOESM2_ESM.pdf]

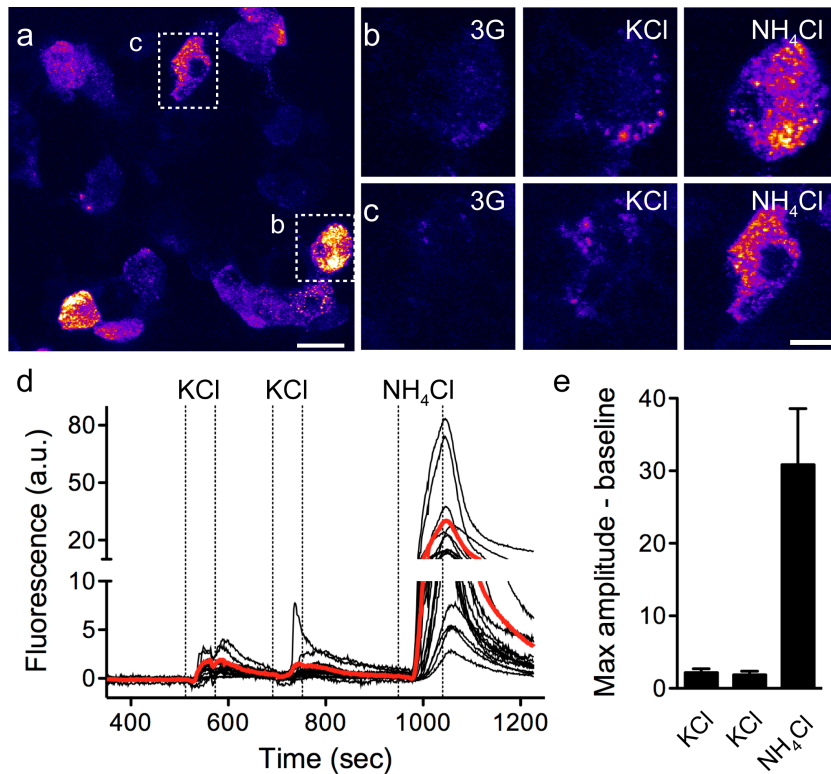

**ESM Fig. 1** NPY-pHluorin visualizes the fraction of released insulin granules. **a** Confocal image of an intact human islet infected with NPY-pHluorin taken 90 s after stimulation with NH<sub>4</sub>Cl (50 mmol/l). A pseudocolor scale was used to illustrate better the changes in fluorescence intensity. Scale bar, 10  $\mu$ m. **b, c** Zoomed confocal images of cells highlighted with boxes in **a**. Images were taken under basal glucose (3 mmol/l, 3G), 1 min after KCl (30 mmol/l) or NH<sub>4</sub>Cl (50 mmol/l) application. Scale bar, 5  $\mu$ m (**b, c**). **d** Traces showing changes in the mean fluorescence intensity of different cells within the islet upon sequential stimulation with KCl and NH<sub>4</sub>Cl. Black traces refer to individual cells and red trace to the whole islet. **e** Quantification of changes in mean fluorescence intensity (maximum amplitude – baseline) induced by KCl and NH<sub>4</sub>Cl (n = 19 cells). KCl depolarization induces an increase in fluorescence that is only a small fraction of that stimulated by NH<sub>4</sub>Cl (~5%). Results are shown as mean  $\pm$  SEM.
